# Supplementary material for: Experience-dependent tuning of early olfactory processing in the adult brain
Source: bioRxiv or medRxiv preprint supplement (doi:10.1101/558734), 2019-02-24
Supplement: Supplementary file [file media-3.pdf]

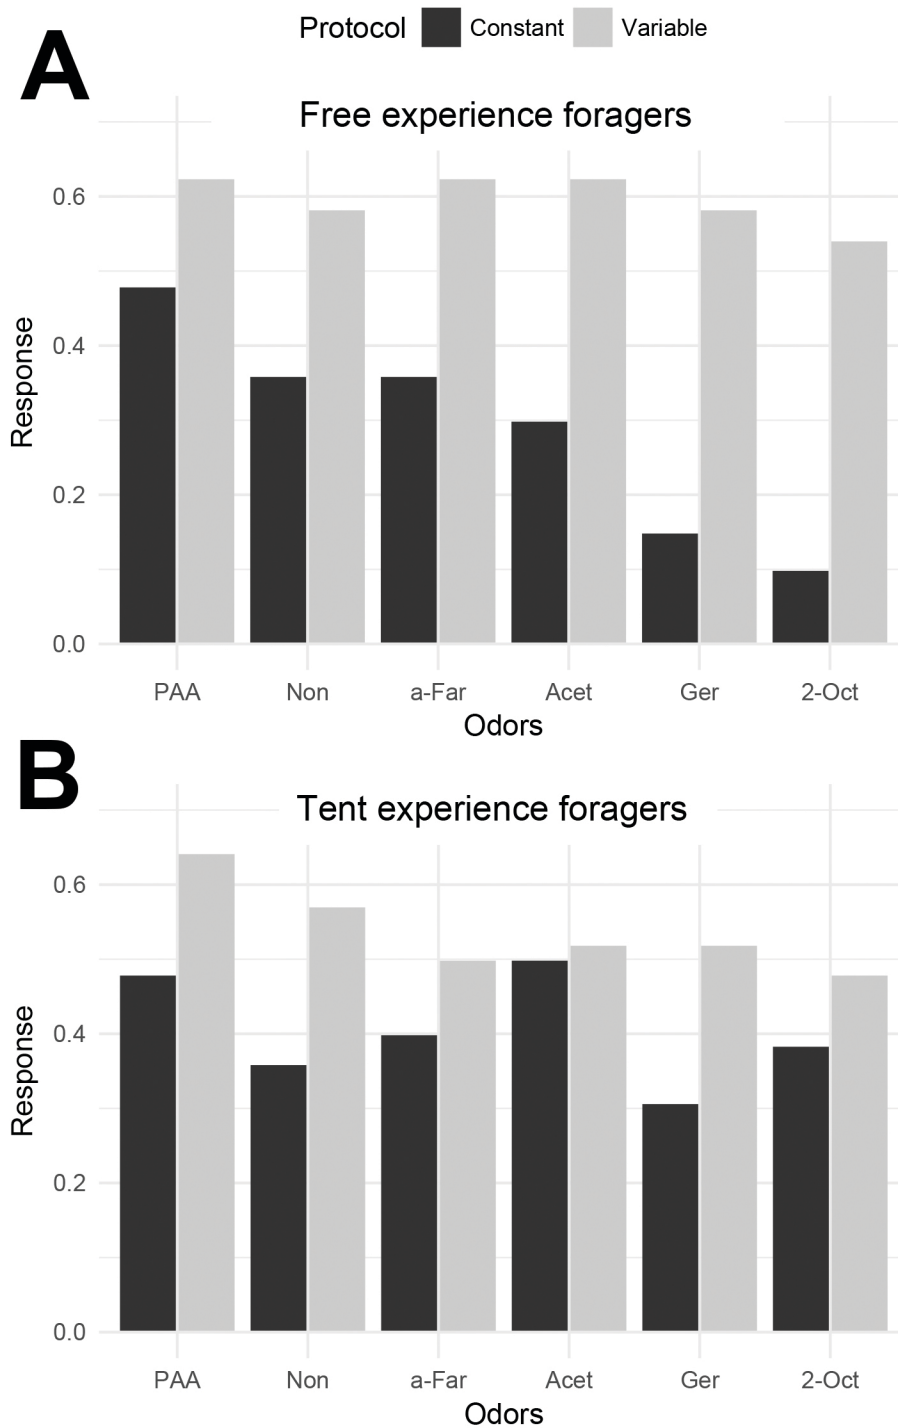

**Figure S3.** The memory response rates for bees 2hrs after receiving the constant acquisition protocol (black) or the variable acquisition protocol (gray) for bees with (A) a free-flying experience and (B) a tent-restricted foraging experience. Sample Sizes: free blend 2 constant N=20, free blend 2 variable N=24, free blend 1 constant N=25, free blend 1 variable N=24, tent blend 2 constant N=26, tent blend 2 variable N=25, tent blend 1 constant N=26, tent blend 1 variable N=28.
